# Supplementary material for: NF-κB activation is critical for bacterial lipoprotein tolerance-enhanced bactericidal activity in macrophages during microbial infection
Source: PubMed Central journal article supplement (PMC5227741; doi:10.1038/srep40418), 2017-01-12
Supplement: srep40418-s1.pdf [file srep40418-s1.pdf]

**NF- $\kappa$ B activation is critical for bacterial lipoprotein tolerance-enhanced  
bactericidal activity in macrophages during microbial infection**

Jinghua Liu, Jing Xiang, Xue Li, Siobhan Blankson, Shuqi Zhao, Junwei Cai, Yong  
Jiang, H. Paul Redmond, and Jiang Huai Wang

**Supplementary Table 1.** Gene expression of membrane-trafficking regulators and lysosomal enzymes in BLP-tolerised bone Marrow-derived macrophages (BMMs) by RT2 profiler PCR arrays

| Refseq       | Gene Symbol | Official Full Name                                | Fold Change | Trend |
|--------------|-------------|---------------------------------------------------|-------------|-------|
| NM_007387    | Acp2        | Acid phosphatase 2, lysosomal                     | 2.62        | Up    |
| NM_007388    | Acp5        | Acid phosphatase 2, tartrate resistant            | 15.71       | Up    |
| NM_008906    | Ctsa        | Cathepsin A                                       | 1.03        |       |
| NM_007798    | Ctsb        | Cathepsin B                                       | 0.49        | Down  |
| NM_009982    | Ctsc        | Cathepsin C                                       | 2.08        | Up    |
| NM_009983    | Ctsd        | Cathepsin D                                       | 0.44        | Down  |
| NM_007799    | Ctse        | Cathepsin E                                       | 0.01        | Down  |
| NM_019861    | Ctsf        | Cathepsin F                                       | 0.54        |       |
| NM_013590    | Lyzl        | Lysozyme 1                                        | 1.63        |       |
| NM_016722    | Galns       | Galactosamine (N-acetyl)-6-sulfate sulfatase      | 1.40        |       |
| NM_029364    | Gns         | Glucosamine (N-acetyl)-6-sulfatase                | 1.70        |       |
| NM_010498    | Ids         | Iduronate 2-sulfatase                             | 1.41        |       |
| NM_018822    | Sgsh        | N-sulfoglucosamine sulfohydrolase (sulfamidase)   | 0.67        |       |
| NM_011421    | Smpd1       | Sphingomyelin phosphodiesterase 1, acid lysosomal | 0.95        |       |
| NM_019734    | Asah1       | N-acylsphingosine amidohydrolase 1                | 0.94        |       |
| NM_001005847 | Aga         | Aspartylglucosaminidase                           | 1.13        |       |
| NM_019441    | Ppt2        | Palmitoyl-protein thioesterase 2                  | 1.23        |       |
| NM_021460    | Lipa        | Lysosomal acid lipase A                           | 0.34        | Down  |
| NM_145937    | Sumf1       | Sulfatase modifying factor 1                      | 1.32        |       |
| NM_021460    | Hexa        | Hexosaminidase A                                  | 0.64        |       |
| NM_010422    | Hexb        | Hexosaminidase B                                  | 0.47        | Down  |
| NM_008548    | Man1a       | Mannosidase 1, alpha                              | 1.05        |       |
| NM_010764    | Man2b1      | Mannosidase 2, alpha B1                           | 0.22        | Down  |
| NM_008079    | Galc        | Galactosylceramidase                              | 0.54        |       |
| NM_008094    | Gba         | Glucosidase, beta, acid                           | 1.99        |       |
| NM_008064    | Gaa         | Glucosidase, alpha, acid                          | 1.23        |       |
| NM_008325    | Idua        | Iduronidase, alpha-L                              | 0.93        |       |

|              |          |                                                              |       |    |
|--------------|----------|--------------------------------------------------------------|-------|----|
| NM_017372    | Lyz2     | Lysozyme 2                                                   | 1.64  |    |
| NM_028243    | Prcp     | Prolylcarboxypeptidase (angiotensinase C)                    | 0.95  |    |
| NM_011189    | Psme1    | Proteasome (prosome, macropain) 28 subunit, alpha            | 0.78  |    |
| NM_009921    | Camp     | Cathelicidin antimicrobial peptide                           | 15.58 | Up |
| NM_010824    | Mpo      | Myeloperoxidase                                              | 0.65  |    |
| NM_019972    | Sort1    | Sortilin 1                                                   | 0.73  |    |
| NM_019441    | Ppt2     | Palmitoyl-protein thioesterase 2                             | 1.28  |    |
| NM_181414    | Pik3c3   | Phosphoinositide-3-kinase, class 3                           | 0.82  |    |
| NM_025887    | Rab5a    | RAB5A, member RAS oncogene family                            | 0.90  |    |
| NM_177411    | Rab5b    | RAB5B, member RAS oncogene family                            | 0.90  |    |
| NM_009005    | Rab7     | RAB7, member RAS oncogene family                             | 1.91  |    |
| NM_016676    | Rab10    | RAB10, member RAS oncogene family                            | 2.52  | Up |
| NM_024448    | Rab12    | RAB12, member RAS oncogene family                            | 1.02  |    |
| NM_011227    | Rab20    | RAB20, member RAS oncogene family                            | 2.16  | Up |
| NM_033475    | Rab34    | RAB34, member of RAS oncogene family                         | 0.72  |    |
| NM_001001932 | Eea1     | Early endosome antigen 1                                     | 0.88  |    |
| NM_010684    | Lamp1    | Lysosomal-associated membrane protein 1                      | 1.19  |    |
| NM_010685    | Lamp2    | Lysosomal-associated membrane protein 2                      | 0.99  |    |
| NM_007653    | Cd63     | Cd63 antigen                                                 | 0.64  |    |
| NM_001029938 | Rilp     | Rab interacting lysosomal protein                            | 0.64  |    |
| NM_053177    | Mcoln1   | Mucolipin 1                                                  | 1.49  |    |
| NM_019400    | Rabep1   | Rabaptin, RAB GTPase binding effector protein 1              | 1.00  |    |
| NM_019983    | Rabgef1  | RAB guanine nucleotide exchange factor (GEF) 1               | 2.18  | Up |
| NM_007508    | Atp6v1a  | ATPase, H <sup>+</sup> transporting, lysosomal V1 subunit A  | 1.02  |    |
| NM_011596    | Atp6vOa2 | ATPase, H <sup>+</sup> transporting, lysosomal V0 subunit A2 | 1.24  |    |
| NM_021433    | Stx6     | Syntaxin 6                                                   | 0.92  |    |
| NM_016797    | Stx7     | Syntaxin 7                                                   | 1.31  |    |
| NM_009295    | Stxbp1   | Syntaxin binding protein 1                                   | 1.04  |    |
| NM_177620    | Rin3     | Ras and Rab interactor 3                                     | 1.66  |    |

The refseq, gene symbol, and the official full names are indicated. The fold change represents the ratio of the gene expression level in BLP-tolerised BMMs to that in naive BMMs. When the fold change is >2, indicating the upregulated (Up) gene expression, and when the fold change is <0.5, indicating the downregulated (Down) gene expression.

**Figure S1**

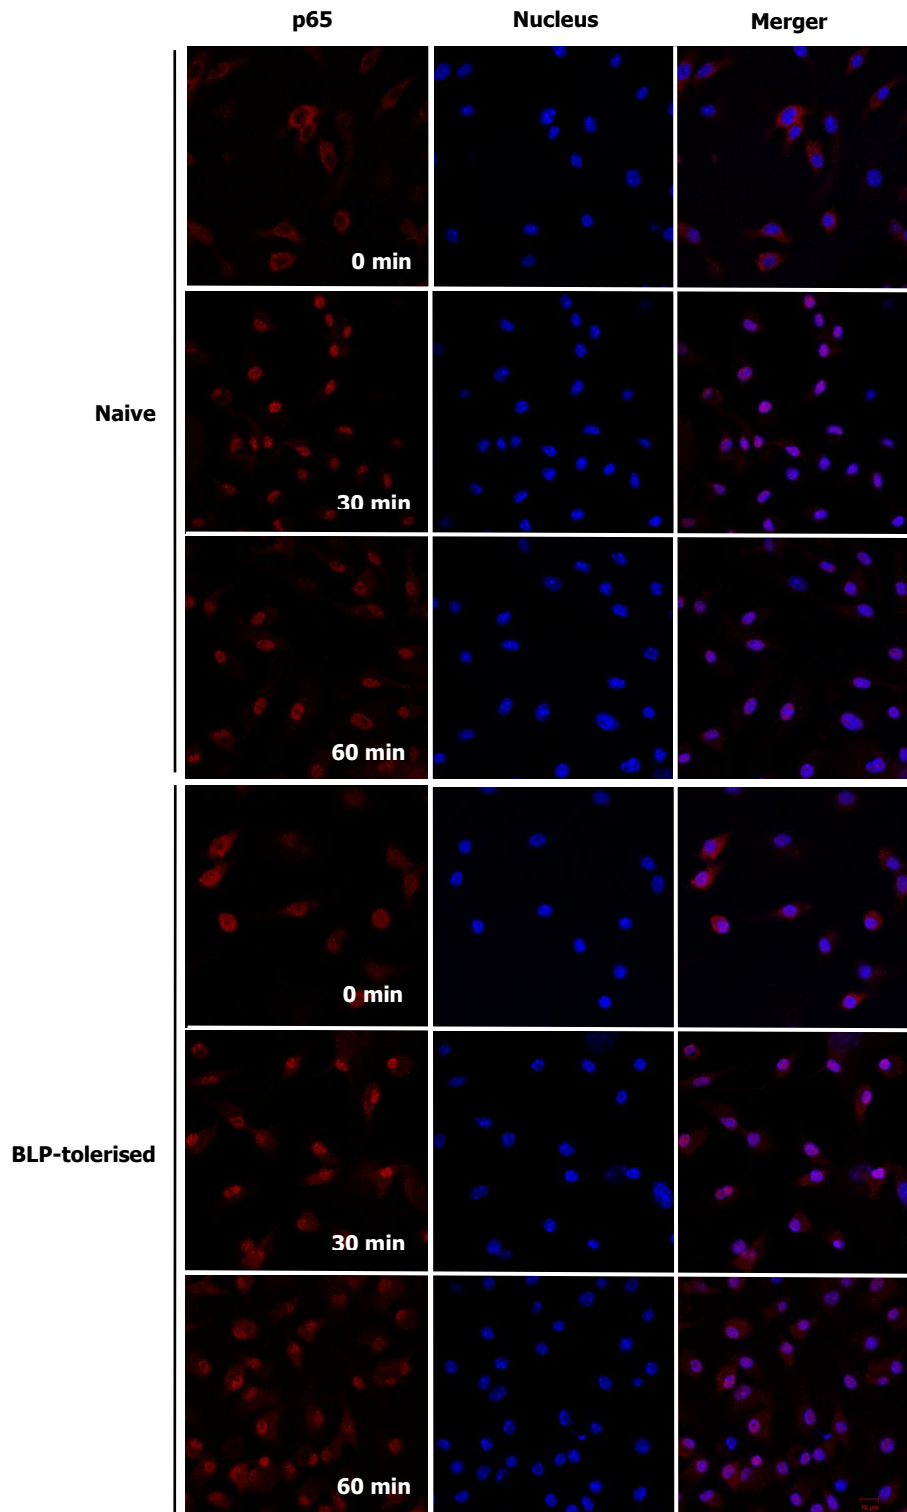

**Fig. S1.** Nuclear translocation of NF- $\kappa$ B p65 upon *S. typhimurium* infection in naive and BLP-tolerised macrophages. Naive and BLP-tolerised BMMs were stimulated with *S. typhimurium* for the indicated time periods. Confocal images were taken after cells were stained with the anti-p65 Ab and Alexa Fluor 594-conjugated secondary Ab.

**Figure S2**

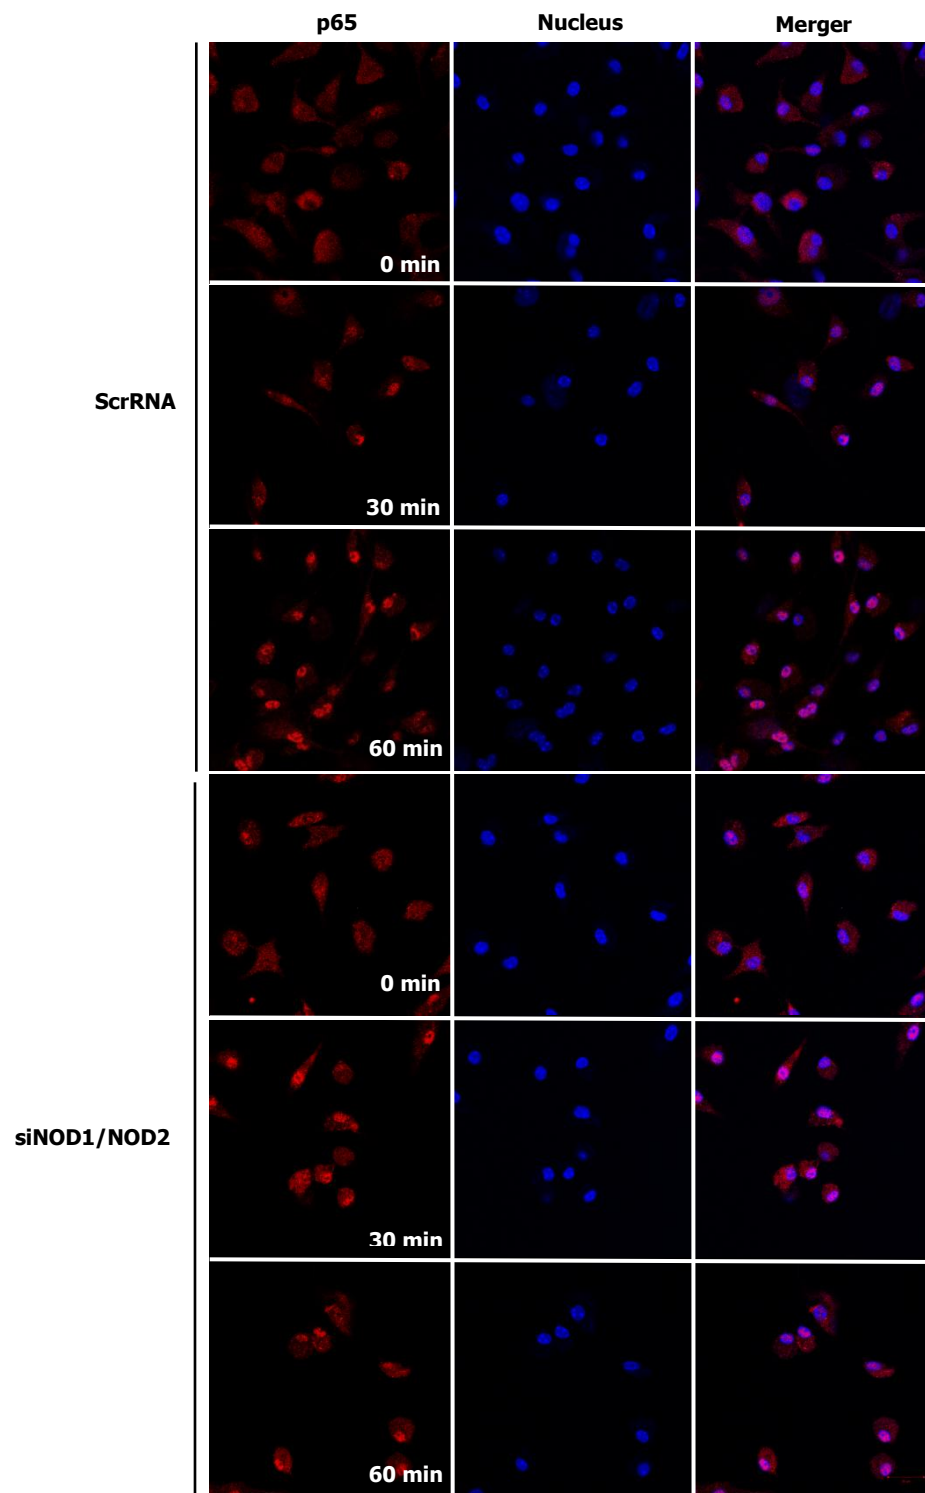

**Fig. S2.** Nuclear translocation of NF- $\kappa$ B p65 upon *S. typhimurium* infection in BLP-tolerised macrophages transfected with siNOD1/NOD2 or scrRNA. BLP-tolerised BMMs transfected with siNOD1/NOD2 or scrRNA were stimulated with *S. typhimurium* for the indicated time periods. Confocal images were taken after cells were stained with the anti-p65 Ab and Alexa Fluor 594-conjugated secondary Ab.
